# Supplementary material for: Skin-electrode iontronic interface for mechanosensing
Source: PubMed Central journal article supplement (PMC8342427; doi:10.1038/s41467-021-24946-4), 2021-08-05
Supplement: 41467_2021_24946_MOESM3_ESM.pdf [file 41467_2021_24946_MOESM3_ESM.pdf]

## **Description of Additional Supplementary Files**

**Supplementary Movie 1 | Response of the SE and the CE.** The capacitance signal sensitively changes when touching the SE while has no detectable change when touching the CE.

**Supplementary Movie 2 | SEMS-based wearable system for continuous monitoring of touch or human motion.**
